# Supplementary material for: Invited perspectives: When research meets practice: challenges, opportunities and suggestions from the implementation of the Floods Directive in the largest Italian river basin
Source: Copernicus journal article supplement (doi:10.5194/nhess-2021-217), 2021-08-26
Supplement: Supplementary file [file nhess-2021-217-AC1-supplement.pdf]

**Manuscript nness-2021-217: “Invited perspectives: When research meets practice: challenges, opportunities and suggestions from the implementation of the Floods Directive in the largest Italian river basin” – Final response to comments from referee 1**

We would like to thank the referee both for his/her appreciation of our paper and for the work he/she did on our manuscript; we greatly appreciate his/her comments as they may contribute to increase the manuscript robustness and, in general, to improve its quality and readability. In the following, we supply a point by point answer to the comments raised by the referee

**RC1.1** Details of the MOVIDA project are not clear. In order to make it a proper example, it would be relevant to understand:

- 1) Which institution started the initiative of responding to the requirement of the flood map revision by a project involving all the partners from administrative bodies and research, rather than trying to solve it internally?
- 2) Was the required funding for MOVIDA just consisting of in-kind contributions, or was it provided by submitting a (research-?) proposal to some funding agency?
- 3) Is information on the project details available? Please give references.

MOVIDA was started by the Po River District Authority who asked for the support of academia to orient decisions on the adoption of the more suitable tools to assess and map flood damage. The project was partly funded by the same Authority and partly co-funded by the consortium of partners (i.e., universities and research centres). More information on MOVIDA can be found in the open-repository of the project\* and on the website of the Po River District Authority\*\* that, in December 2021, published the results of the implementation of the MOVIDA tools in several areas of potentially significant flood risk (APFRRs) in the District. Such details will be added to the revised version of the paper. Moreover, the description of the different steps of the project, along with a diagram, will be added to answer comments from referee 2.

\* [https://polimi365-my.sharepoint.com/:f:/g/personal/10425403\\_polimi\\_it/EvsgjK3x-rJNmzK5FGg4zYBmtlBXrOVnrzn2kGUamMcVA?e=d3](https://polimi365-my.sharepoint.com/:f:/g/personal/10425403_polimi_it/EvsgjK3x-rJNmzK5FGg4zYBmtlBXrOVnrzn2kGUamMcVA?e=d3) <https://pianoalluvioni.adbpo.it/piano-gestione-rischio-alluvioni-2021KaBG>

\*\* <https://pianoalluvioni.adbpo.it/piano-gestione-rischio-alluvioni-2021>

**RC1.2** (line 26) The website <http://www.fdm.polimi.it/> has no relevant content.

We do not agree with the referee. The repository includes many flood damage models available in the literature, classifying them according to the country of development, the damaged element, the kind of damage (i.e., direct vs indirect) considered, etc. This way it supplies a quite exhaustive overview of state of art on flood damage modelling. For this reason, we will leave the reference.

**RC1.3** (line 35 ff) I would also assume that interruptions of electric power and pollution effects (for example, oil spill) should be counted under indirect effects, even if just augmenting other damage. This was observed as a consequence of other flooding events. Have they been relevant in the Po river region?

In fact, evidence collected during the project corroborates literature findings on the importance of electric power disruption and contamination among indirect flood damage (we will quote them as examples in the new version). Still, considering the present paucity of modelling tools for these kinds of damage (that is already discussed in the paper) and the lack of sufficient open data to evaluate the exposure of electric lines, their evaluation was not possible in MOVIDA. Of course, it will be the focus of next research activities.

**RC1.4** (line 40-43) Unavailability of data can also have legal reasons. Is this nothing you came across? The other issue is probably that there are commercial reasons for withholding the data. I think this could be named, rather than just assigning the word “private” for explaining lacking availability.

We are not sure what referee means with “legal”. If he/she refers to security reasons that, for example, hamper the publication of sensible data like the location of hazardous installations, this may happen in Italy. We will add this perspective in the revised version of the paper. Likewise, we will accept the suggestion to refer to “commercial” instead of “private data”.

**RC1.5** I do not understand what you mean with “complimentary” and existing duplications here.

We mean that the same asset can be present in more than one database. In the new version, we will reframe the sentence to make it clearer.

**RC1.6** (line 49-53) Damage assessment is a precondition for calibration of a damage model (for example, addressing the relation to flood levels). Was the goal just the assessment, or also the calibration and modelling? The latter two are needed for decision making.

We are sorry but we do not understand the comment. In MOVIDA, existing or newly developed damage models are implemented to supply an estimation of expected flood impacts on a certain area at risk, in the support of decision making. The implemented models were chosen among those calibrated and validated (in their developing phase) in contexts that are comparable to the implementation one.

**RC1.7** (line 56) Was it really just the research institutions committing to work together, and not also the administrative institutions? This would actually surprise me.

We are referring here to the commitment to find together (shared) state of the art solutions to emerged problems; of course, knowledge transferability was possible only thanks to the commitment of administrative institutions too.

**RC1.8** (line 89-90) With respect to sustainability, I wonder why you suggest to go for a COST or EU funded project. In the end, it must be administrative bodies of different regions and countries which organize their cooperation. To my knowledge, this is actually a requirement of the European Water Directive, which addresses river basins.

As discussed in the paper, the suggestion goes into the direction of replicating the successful MOVIDA partnership between academia and public institutions in pursuing the objectives of the Floods Directive, calling for the need of upscaling the focus on harmonisation.
