# Supplementary material for: Invited perspectives: When research meets practice: challenges, opportunities and suggestions from the implementation of the Floods Directive in the largest Italian river basin
Source: Copernicus journal article supplement (doi:10.5194/nhess-2021-217), 2021-08-26
Supplement: Supplementary file [file nhess-2021-217-AC2-supplement.pdf]

**Manuscript nness-2021-217: “Invited perspectives: When research meets practice: challenges, opportunities and suggestions from the implementation of the Floods Directive in the largest Italian river basin” – Final response to comments from referee 2**

We would like to thank the referee both for his/her appreciation of our paper and for the work he/she did on our manuscript; we greatly appreciate his/her comments as they may contribute to increase the manuscript robustness and, in general, to improve its quality and readability. In the following, we supply a point by point answer to the comments raised by the referee

**RC2.1** a flow diagram representing the main components of the MOVIDA project is highly recommended; otherwise, the readers will not fully understand how articulated is the project

A description of the main steps of the project and an explicative diagram will be added to the revised version of the manuscript

**RC2.2** a section (just half a page, no more since this is a short perspective) on the advance of MOVIDA with respect to other similar projects (not only in Italy) is recommended; an improvement of literature is necessary

A critical comparison of damage assessment performed in MOVIDA and tools/methods presently implemented in the various European Member States to assess and map flood damage within the scope of the Floods Directive will be added to the new version of the manuscript. Discussion will be supported by a summary table. On the contrary, we do not think this is the place to discuss literature on flood damage modelling.

**RC2.3** a mention (in the manuscript, not in the acknowledgement) of all the institutions involved in MOVIDA is recommended, maybe adding these in the above-mentioned flow diagram

We think this option would take the reader away from the main core of the paper. However, we will add a funding section where we list all involved institutions, also to answer comment from referee 1

**RC2.4** an additional figure (location map) on the study area (the Po River basin), with 2-3 popups representative location subject to floods (occurred events) and/or at risk of floods, could also help in improving the value and readership.

A map of the District with the identification of the potentially flooded areas will be added in the revised version of the paper
